# Supplementary material for: Effect of Hydroxyapatite on the Mechanical Properties and Corrosion Behavior of Mg-Zn-Y Alloy
Source: MDPI journal article supplement (doi:10.3390/ma10080855), 2017-07-26
Supplement: s1 [file s1]

# Supplementary Materials: effect of hydroxyapatite on the mechanical properties and corrosion behavior of Mg-Zn-Y alloy

Chun Chiu<sup>1</sup>, Chih-Te Lu<sup>1</sup>, Shih-Hsun Chen<sup>1</sup>, Keng-Liang Ou<sup>2,3,4,5\*</sup>

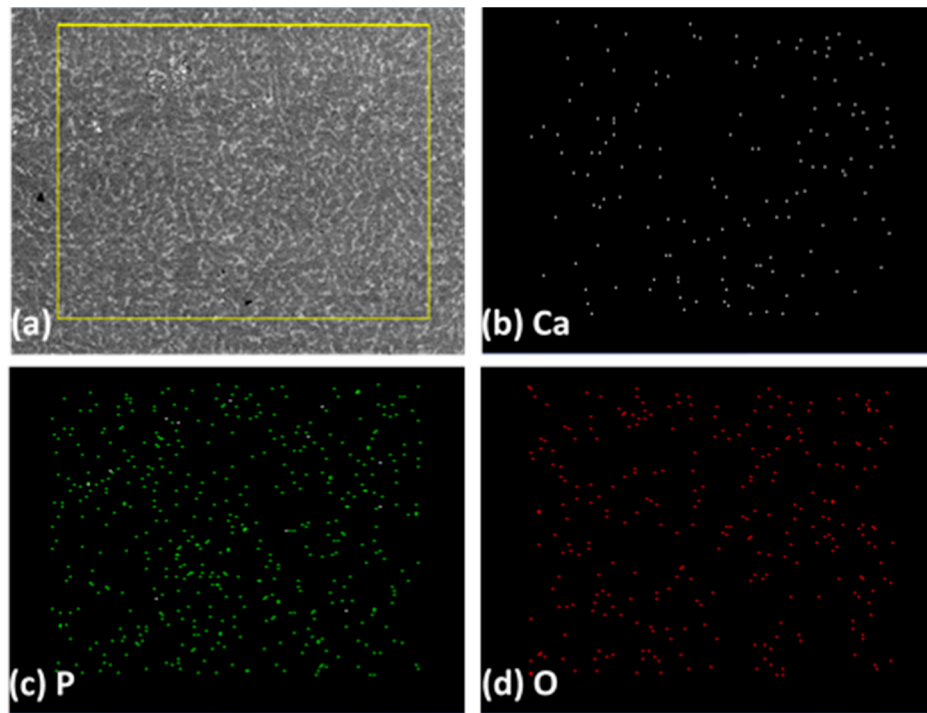

**Figure S1** (a) SEM micrograph of HA-C alloy ( $\text{Mg}_{97}\text{Zn}_1\text{Y}_2$ -0.5wt% HA), and Element mapping of (b) Ca element, (c) P element, and (d) O element in HA-C (SEM and element mapping).
